# Supplementary material
Source: publisher figshare collection journal article supplement (https://frontiersin.figshare.com/ndownloader/files/17762030)
Supplement: Supplementary file [file 17762030]

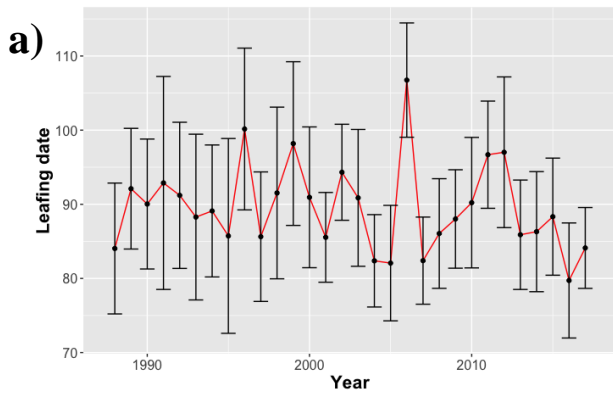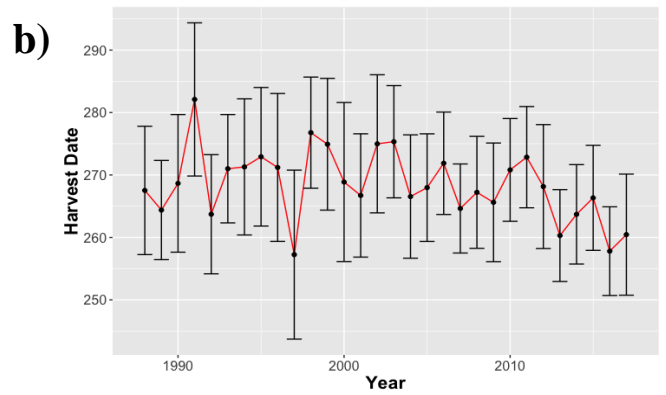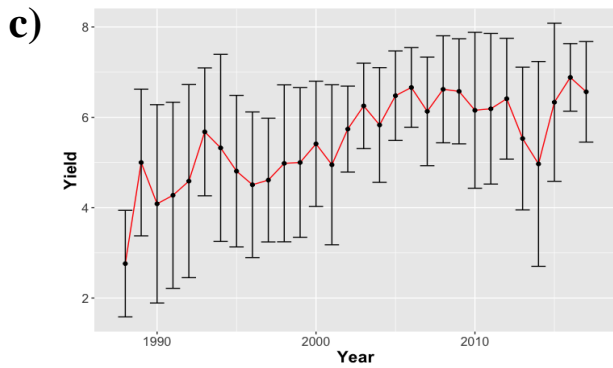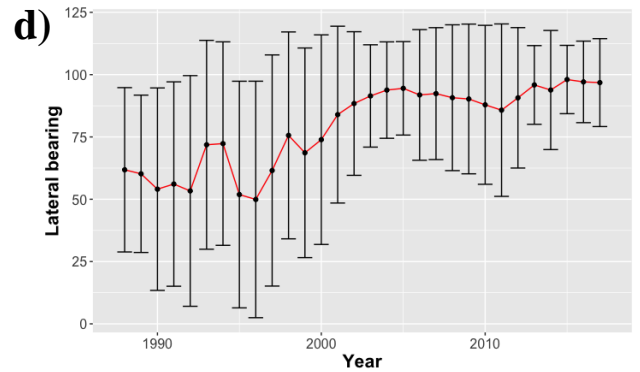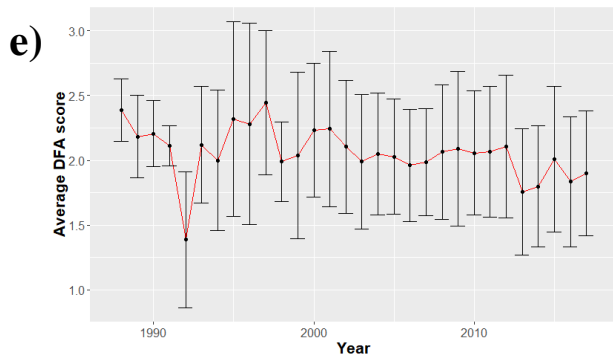

**Supplementary Figure S2:** Genetic trend of leafing date (a), harvest date (b), yield (c), lateral fruit-bearing (d) and pellicle color (e), within the UCD-WIP from 1988 to 2017.
